# Supplementary material
Source: Springer Nature journal article supplement (https://www.springermedizin.de/resource/supplementary/13013_2011_427_MOESM1_ESM.pdf/9631850)

# Degrees Late-Onset Juvenile and Adolescent Idiopathic Scoliosis

N=272 (Mean  $\pm$  1 SD)

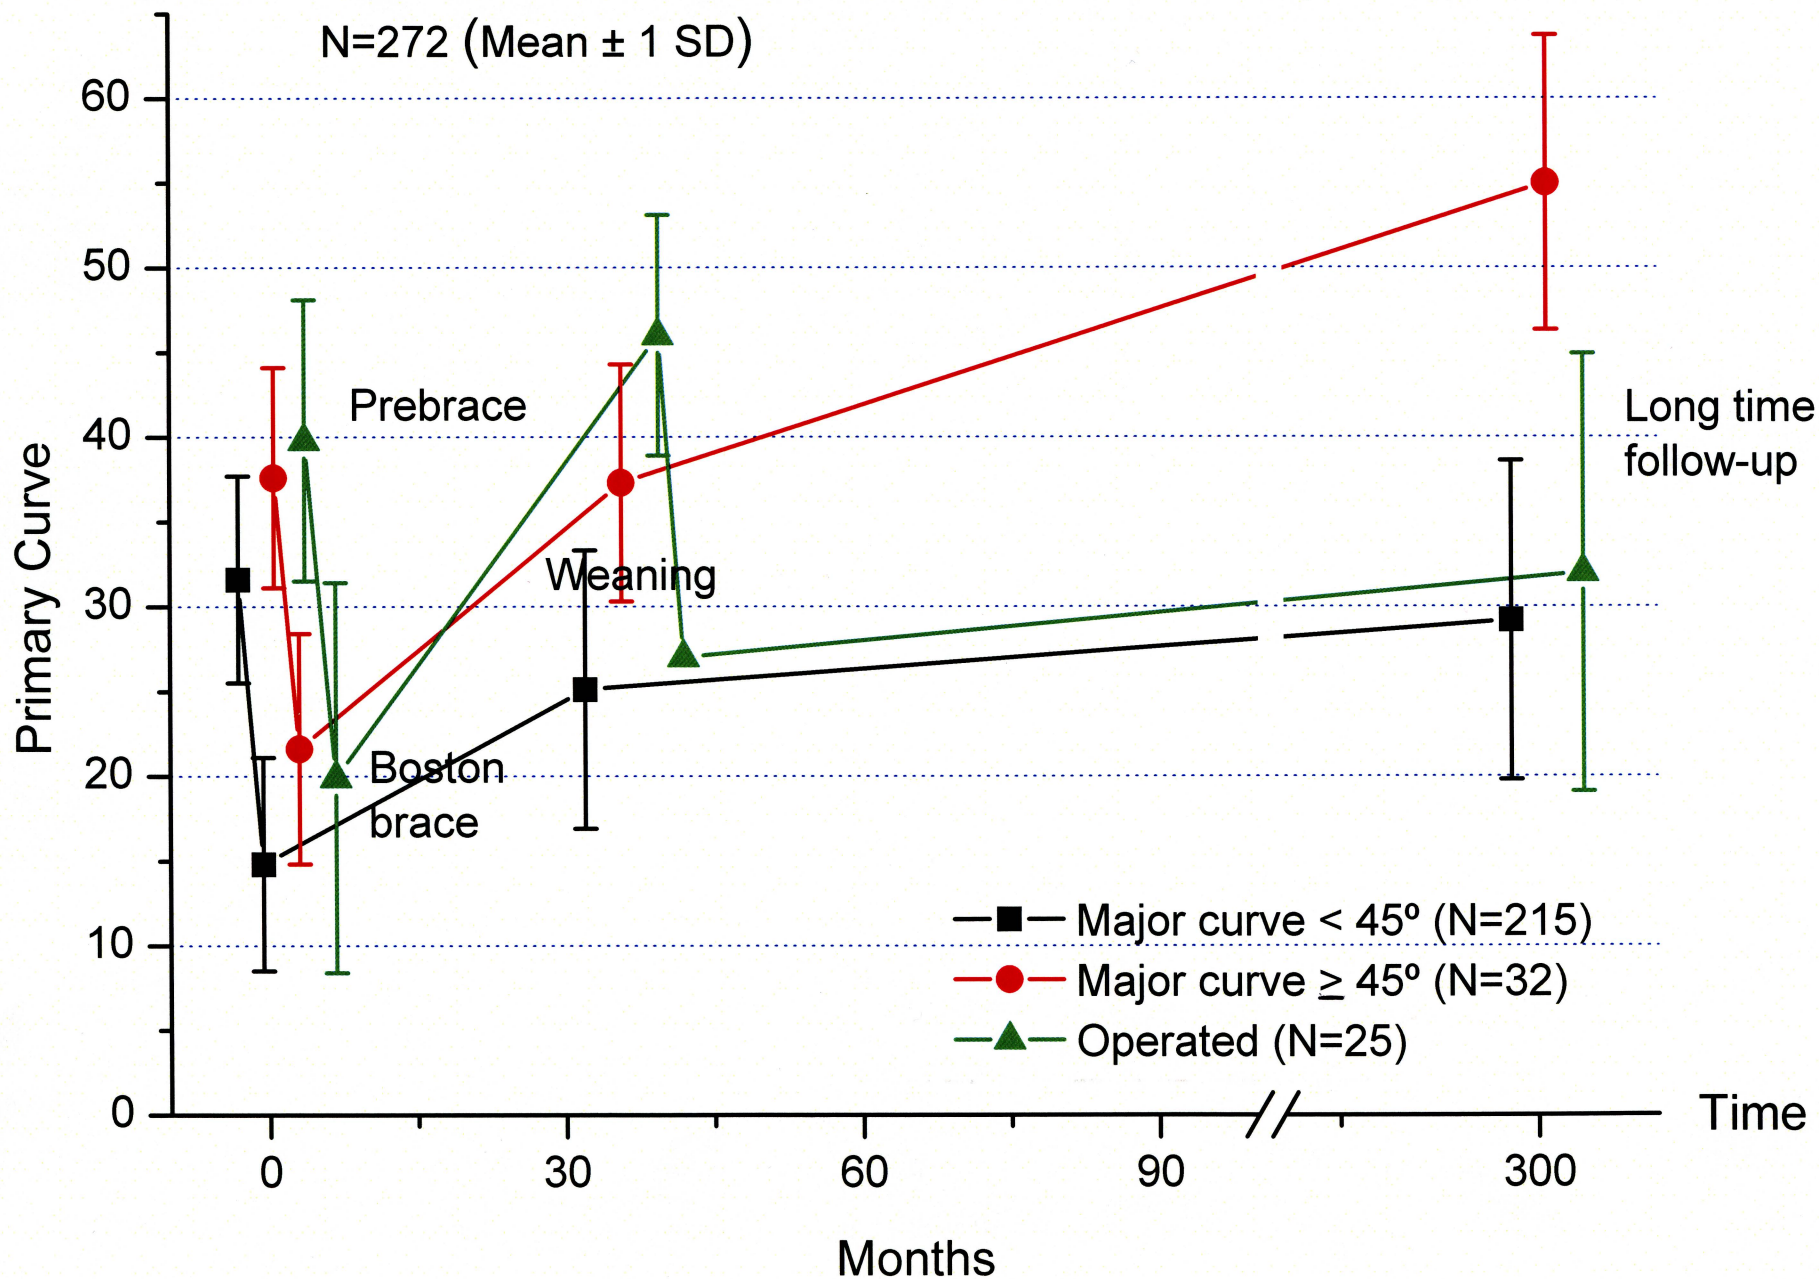

Supplement: MOESM1 [file 9631850]
